# Supplementary material for: Increased Umbilical Cord PAI-1 Levels in Placental Insufficiency Are Associated with Fetal Hypoxia and Angiogenesis
Source: PubMed Central journal article supplement (PMC4745644; doi:10.1155/2016/7124186), 2016-01-19
Supplement: 7124186.f1.pdf [file 7124186.f1.pdf]

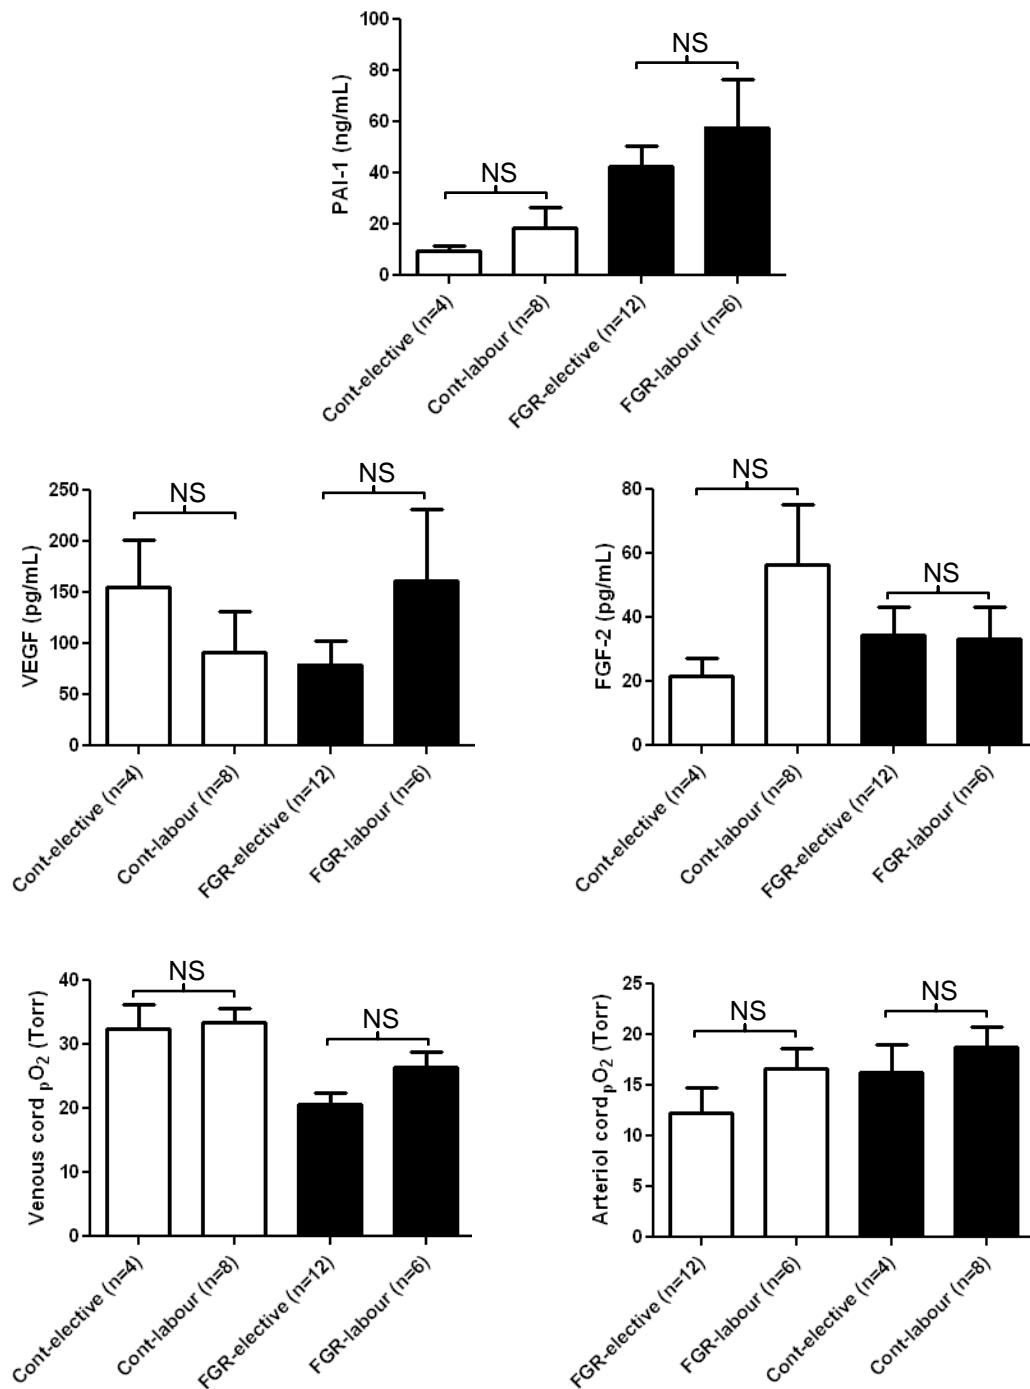

**SUPPLEMENTARY FIGURE 1. Mode of labor had no effect on protein expression or umbilical blood oxygen.** Levels of umbilical oxygen, PAI-1, total VEGF, and FGF-2 by delivery type (vaginal labor or elective caesarean-section). Separate comparison was made for control and PI samples to determine the effect of delivery type. There was no significant effect of delivery type for either condition. Significance was determined by t-test or Mann-Whitney as appropriate following F-test. Standard error of the mean is indicated.

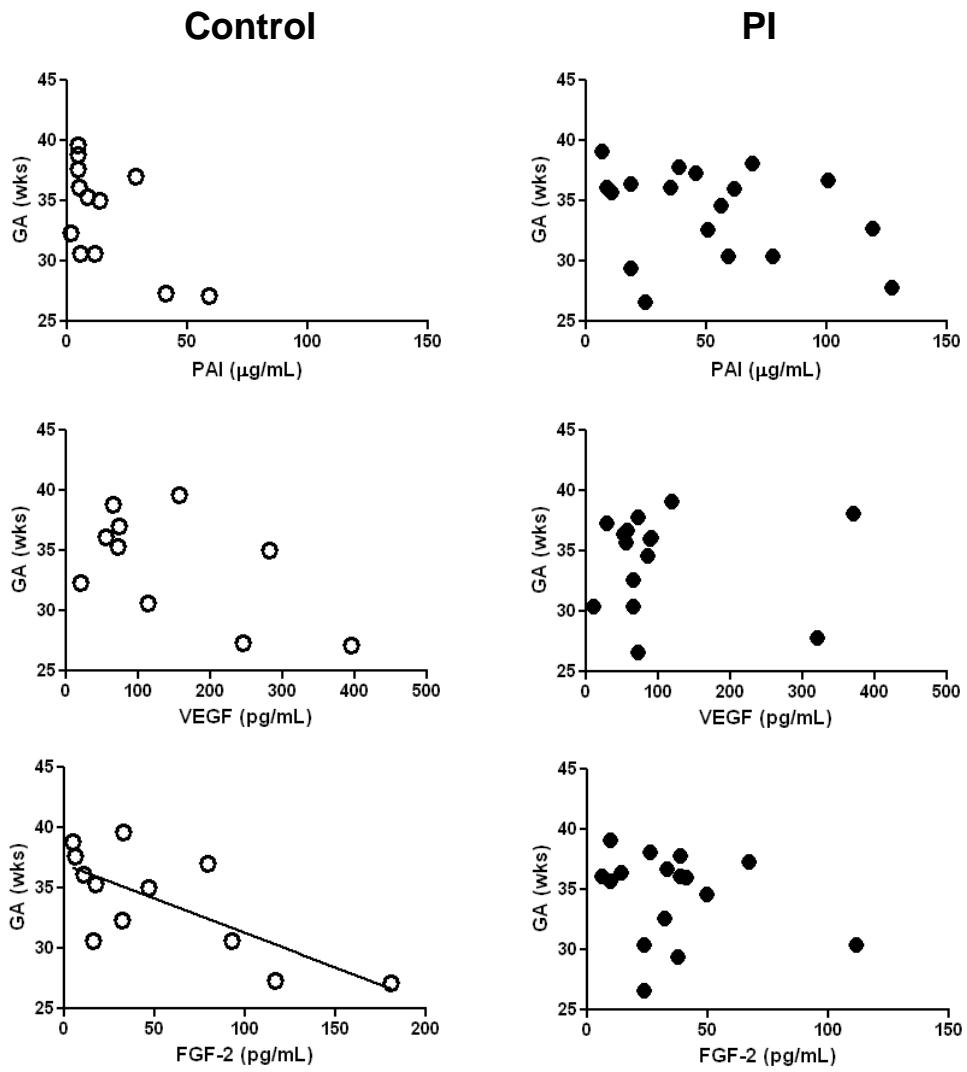

**SUPPLEMENTARY FIGURE 2. PAI-1 did not change with GA.** Effect of gestational age on PAI-1, VEGF, and FGF-2 levels. Separate Pearson’s correlations were made between control (open circles) and PI (closed circle) groups. Only FGF-2 exhibited any relationship, exhibiting a significant negative correlation with gestational age ( $r=-0.72$ ,  $p=0.002$ ).
